# Supplementary material for: Cluster-Randomized Trial of a Mobile Phone Personalized Behavioral Intervention for Blood Glucose Control
Source: PubMed Central journal article supplement — Diabetes Care. 2011 Aug 19;34(9):1934–42. doi: 10.2337/dc11-0366 (PMC3161305; doi:10.2337/dc11-0366), 2011-08-19

### Supplementary Figure 1. Mobile Diabetes Management Software Application (MDMA): Example of a low blood glucose coaching message

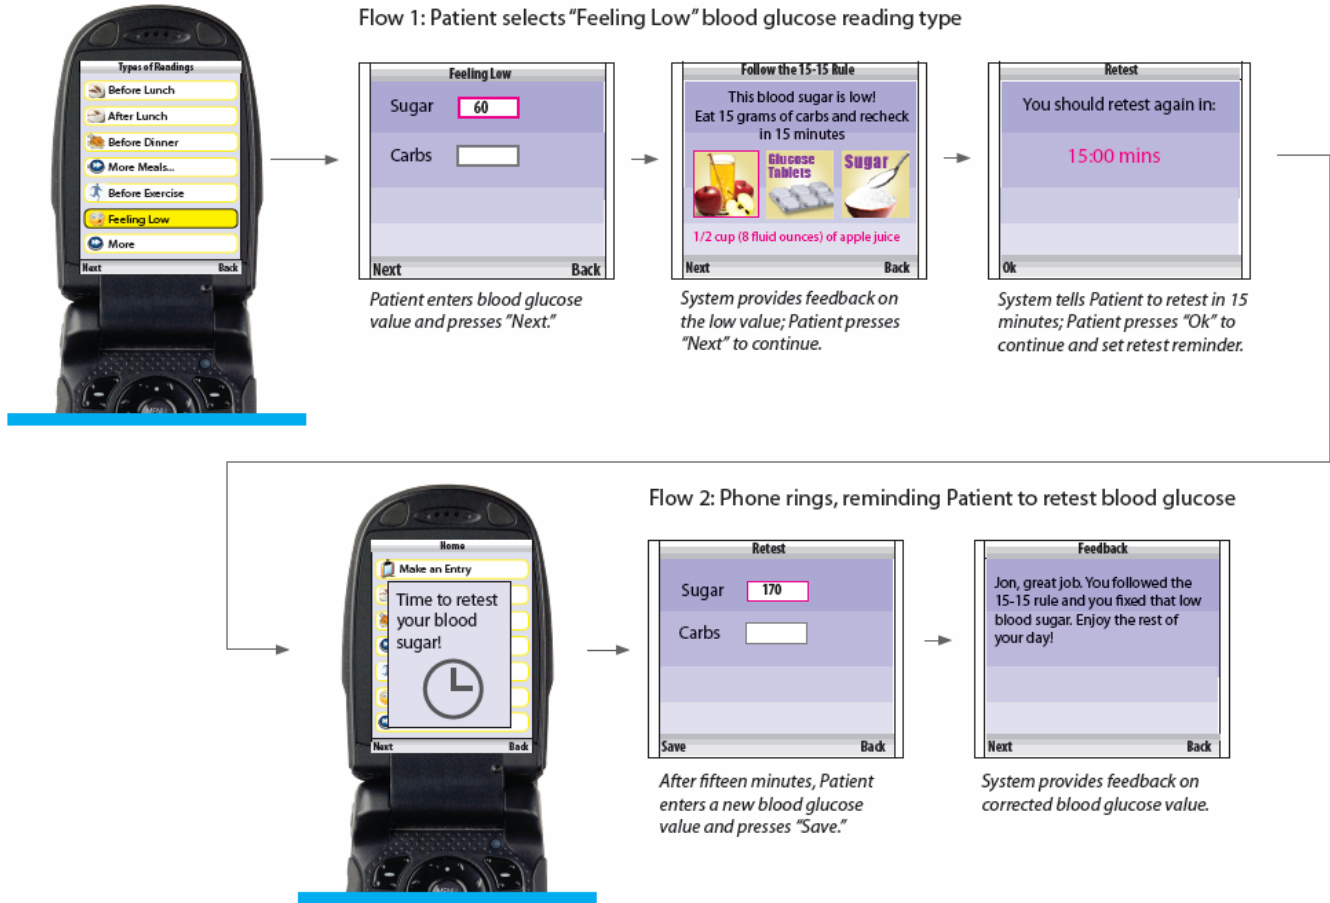

Supplement: supp_dc11-0366v110366_DC110366SupplementaryData.pdf [file supp_dc11-0366v110366_DC110366SupplementaryData.pdf]
